1  
2  
3  
4  
5  
6  
7  
8  
9  
10  
11  
12  
13  
14  
15  
16  
17  
18  
19  
20  
21  
22  
23

**The biology of APP in preclinical cellular models of Down syndrome**

**Endosomal structure and APP biology are not altered in preclinical cellular models of Down syndrome**

Claudia Cannavo<sup>1,2</sup>, Karen Cleverley<sup>2</sup>, Cheryl Maduro<sup>2</sup>, Paige Mumford<sup>2</sup>, Dale Moulding<sup>3</sup>, Elizabeth M. C. Fisher<sup>2,4</sup>, Frances K. Wiseman<sup>1,4\*</sup>

1 UK Dementia Research Institute at UCL, London, WC1N 3BG UK

2 Department of Neuromuscular Disease, UCL Queen Square Institute of Neurology, London, WC1N 3BG UK

3 Light Microscopy Core Facility, Great Ormond Street Institute of Child Health, University College, London, WC1N 1EH UK

4 LonDownS Consortium

\*Corresponding Author: [f.wiseman@ucl.ac.uk](mailto:f.wiseman@ucl.ac.uk)

24 **Abstract**

25

26 Individuals who have Down syndrome (trisomy 21) are at greatly increased risk of  
27 developing Alzheimer's disease – dementia. Alzheimer's disease is characterised by  
28 the accumulation in the brain of amyloid- $\beta$  plaques that are a product of amyloid  
29 precursor protein, encoded by the *APP* gene on chromosome 21. In Down syndrome  
30 the first site of amyloid- $\beta$  accumulation is within endosomes and changes to endosome  
31 biology occur early in disease. Here we determine if primary mouse embryonic  
32 fibroblasts isolated from two mouse models of Down syndrome can be used to study  
33 endosome and APP cell biology. We report that in these cellular models of Down  
34 syndrome endosome number, size and APP processing are not altered, likely because  
35 *APP* is not dosage sensitive in these models, despite three copies of *App*.

36

37

38

## 39 Introduction

40

41 Individuals with Down syndrome (DS), which is caused by trisomy of human  
42 chromosome 21 (Hsa21), have a high risk of developing early onset Alzheimer's  
43 disease (AD). One of the earliest neuropathological features of AD in people who have  
44 DS is the intracellular accumulation of amyloid- $\beta$  in the brain, followed by the  
45 accumulation of extracellular amyloid- $\beta$  plaques [1]. Amyloid- $\beta$  is a product of the *APP*  
46 gene that is encoded on Hsa21. Clinical-genetic studies indicate that three copies of  
47 *APP* are both sufficient and necessary for the development of early onset AD in people  
48 who have DS and in the general population. However, growing evidence suggests that  
49 other genes on Hsa21 can affect APP/amyloid- $\beta$ , including via modulation of  
50 endosomal biology [2].

51

52 APP follows the central secretory pathway. Full-length APP is synthesised in the  
53 endoplasmic reticulum, transported to the Golgi and then to the plasma membrane  
54 [3,4]. From there, APP is internalized through endocytosis and either recycled to the  
55 plasma membrane or Golgi, or directed for degradation to the endo-lysosomes [5–7].  
56 Where APP lies in the cell is important for its degradation. APP mainly undergoes two  
57 alternative types of processing, through the action of different secretases. The most  
58 common processing pathway is 'non-amyloidogenic', which principally occurs at the  
59 plasma membrane and consists of sequential cleavage by  $\alpha$ - and  $\gamma$ -secretases. The  
60 second 'amyloidogenic' pathway leads to the production of amyloid- $\beta$ , mainly occurs  
61 in endosomes and is mediated by sequential cleavage of APP by  $\beta$ - and  $\gamma$ -secretases  
62 [8,9]. Cleavage by  $\beta$ -secretase occurs first, and results in the production of an

63 extracellular fragment that is released from the cell (sAPP $\beta$ ) and of a transmembrane  
64 fragment ( $\beta$ -CTF) which is then cleaved by  $\gamma$ -secretase to produce amyloid- $\beta$ .

65

66 Endosomal dysfunction and enlargement is observed in the brains of people who have  
67 AD and DS before amyloid- $\beta$  plaque accumulation and has been suggested to be a  
68 key factor in AD development [10–12]. Indeed this has been reported in early gestation  
69 of individuals with DS [11,13], in cells isolated from individuals with DS [14], in iPSCs-  
70 derived trisomy-21 neurons and organoids [15–17], and in mouse models of DS [18].  
71 Whether this enlargement is caused by an increased fusion of endosomal bodies or  
72 an increase in the volume of single endosomes is disputed [19], likely because of the  
73 technical challenges encountered in the precise quantification of the very small  
74 endosomal bodies [20–22].

75

76 *APP* triplication is necessary for early endosomal dysfunction in DS models and is  
77 mediated by raised  $\beta$ -CTF [18,21]. Other Hsa21 genes/proteins may also contribute  
78 to this dysfunction [18,23]. For example, synaptojanin-1 (*SYNJ1*), is a phosphatase  
79 that mediates the uncoating of clathrin-coated vesicles. *SYNJ1* levels are increased in  
80 the brains of people who have DS, and its overexpression causes endosomal  
81 enlargement [23]. The Hsa21 gene Intersectin-1 (*ITSN1*) encodes a regulator of  
82 endocytosis [24] and its levels are increased in DS [25]. Overexpression of the  
83 Regulator of Calcineurin 1 (*RCAN1*) affects vesicle recycling and endocytosis via its  
84 effect on calcineurin activity [26]. Finally, the Hsa21 microRNA gene *miR-155*  
85 negatively regulates the transcription of *SNX27*, a component of the retromer complex,  
86 and *SNX27* levels are decreased in DS [27]. Since APP is subject to retrograde  
87 transport, impairment of this mechanism could lead to a longer residency of APP inside

88 early endosomes, causing a change in early endosome structure, increased  
89 amyloidogenic processing of APP and modifying APP half-life [28].

90

91 In addition, research in preclinical systems suggests that genes on Hsa21 including  
92 *DYRK1A* and *BACE2* can modulate APP/A $\beta$  biology when in three-copies [17,29,30].

93 Overexpression of *DYRK1A* in the brain of APP transgenic mice increases the total  
94 abundance of APP and A $\beta$  via phosphorylation of APP at Thr668. *BACE2* mostly  
95 functions as  $\theta$ -secretase but may also degrade A $\beta$  or cleave APP at the  $\beta$ -secretase  
96 site [31–33]. A recent study in organoids generated from trisomy 21 iPSCs  
97 demonstrated that three copies of *BACE2* protect against amyloid- $\beta$  accumulation in  
98 that system [17]. These findings are consistent with gene-association studies  
99 implicating these genes in AD-risk in individuals who have DS [34–36].

100

101 Here, we investigate whether novel cellular models of DS that carry three copies of  
102 114 or 30 mouse gene homologues of Hsa21 genes including *App*, *Synj1*, *Itsn1*,  
103 *Rcan1*, *Mir155*, *Dyrk1A* and *Bace2* can be used to study APP/amyloid- $\beta$  and  
104 endosomal biology.

105

106

## 107 **Results**

108

109 **Three copies of Hsa21 gene homologues in Dp1Tyb and Dp2Tyb mouse**  
110 **embryonic fibroblasts do not alter endosome numbers**

111

112 We aimed to determine if an additional copy of Hsa21 homologues previously  
113 implicated in changed endosomal biology in DS were sufficient to increase the number  
114 or size of endosomes in mouse embryonic fibroblasts (MEFs) derived from segmental  
115 duplication mouse models of DS. Therefore, we established a systematic workflow for  
116 quantification of the number and the size distribution of early endosomes, using RAB5  
117 staining, confocal imaging and deconvolution (**Supplementary Fig 1**). This workflow  
118 was validated by the over-expression of GFP-Rab5CA (Q79L) (RAB5CA), [37] in  
119 wildtype (WT) MEFs (**Supplementary Fig 2**), leading to the expression of  
120 constitutively active RAB5 which enlarges endosomal bodies.

121

122 We then used this system to study MEFs derived from Dp(16Lipi-Dbtb21)1TybEmcf  
123 [herein referred to as Dp1Tyb] and Dp(16Mis18a-Runx1)2TybEmcf [Dp2Tyb]  
124 hemizygous mouse models of DS. The Dp1Tyb mouse has a segmental duplication  
125 of mouse chromosome 16 (Mmu16) that is homologous with Hsa21 and has an  
126 additional copy of 114 mouse orthologues of Hsa21 genes [38,39], including *App*,  
127 *Synj1*, *Itsn1*, *Rcan1*, *Mir155*, *Dyrk1A* and *Bace2*. The Dp2Tyb mouse model carries a  
128 segmental duplication of a smaller region of Mmu16 [38,39], of 30 genes including  
129 *Synj1* and *Itsn1* but does not contain an additional copy of *App* or *Mir155* (**Fig. 1A**).

130

131 Using our workflow, we found no difference in the number of RAB5<sup>+</sup> endosomes  
132 normalised to cell volume in WT and Dp1Tyb MEFs (WT = 2218 ± 58; Dp2Tyb = 2503  
133 ± 119, N = 5 biological repeats) (**Fig. 1B**). Notably, biological variation in the number  
134 of RAB5<sup>+</sup> endosomes between MEF isolates from individual litters of mice was  
135 observed, necessitating for our onward analysis a nested design that enabled us to  
136 compare the two genotypes while accounting for the variability between litters. Using

137 the same methods described above, no difference was found in the number of  
138 endosomes in WT and Dp2Tyb MEFs (WT =  $2809 \pm 101$ ; Dp2Tyb =  $3306 \pm 266$  N = 2  
139 biological replicates) (**Fig. 1C**).

140

141

### 142 **Three copies of Hsa21 mouse homologues in Dp1Tyb and Dp2Tyb MEFs do not** 143 **increase endosomal volume**

144 Using our workflow, we determined the volume distribution of RAB5<sup>+</sup> endosomes in  
145 WT and Dp1Tyb MEFs. The average volume for the total number of endosomes was  
146 consistent with our initial pipeline studies in WT MEFs (WT =  $0.07 \pm 0.001 \mu\text{m}^3$ ,  
147 Dp1Tyb =  $0.06 \pm 0.001 \mu\text{m}^3$ ). WT MEFs isolated from the littermates of the segmental  
148 duplication mice were used to determine the 50 and 90 percentile values of endosomal  
149 volumes and these data were used to classify endosomes from both genotypes as  
150 small (0–50 percentile), medium (50–90 percentile) and large (> 90%). No difference  
151 in size distribution was found between WT and Dp1Tyb MEFs. The average volumes  
152 of endosomes classified as ‘large’ were compared and no difference was found  
153 between WT and Dp1Tyb MEFs (average volume of large endosomes: WT =  $0.29 \pm$   
154  $0.006 \mu\text{m}^3$ , Dp1Tyb =  $0.27 \pm 0.003 \mu\text{m}^3$  N = 5 biological repeats) (**Fig 2A, C**). Using  
155 the same method, no difference in the volume distribution or average volume of the  
156 large endosomes was found in WT and Dp2Tyb MEFs (average volume: WT =  $0.96 \pm$   
157  $0.24 \mu\text{m}^3$ , Dp2Tyb =  $0.71 \pm 0.63 \mu\text{m}^3$  N = 2 biological repeats) (**Fig. 2B, D**). Two  
158 different confocal microscopes (LSM800 and LSM880) were used for the Dp1Tyb and  
159 Dp2Tyb studies, resulting in the difference in absolute WT endosomal volume across  
160 the two experiments.

161

162

163 **Three-copies of *App* do not lead to raised APP protein level or altered half-life**  
164 **in the Dp1Tyb MEF model system**

165 Previous work has suggested that three copies of *APP* and the resulting raised levels  
166 of APP protein and the APP cleavage product  $\beta$ -CTF are critical to the enlargement of  
167 early endosomes in the context of DS ([40]). Thus, we determined if three copies of  
168 *App* were sufficient to raise APP protein level in the Dp1Tyb MEFs or alter the protein  
169 half-life. We crossed the Dp1Tyb mouse model with a heterozygous *App* knockout  
170 animal *App<sup>tm1Dbo</sup>* (*App<sup>+/-</sup>*) to generate MEFs and studied three of the resulting  
171 genotypes: Dp1Tyb with 3 copies of *App* (Dp1Tyb), Dp1Tyb/*App<sup>+/-</sup>* with 2 copies of  
172 *App* and WT with 2 copies of *App*.

173

174 MEFs with the three genotypes were treated with cycloheximide and collected at 0 h,  
175 15 min, 30 min, 1 h, 2 h and 4 h. APP protein abundance at each time point was  
176 measured by western blotting and a non-linear regression test was used to determine  
177 APP half-life. We found no difference in APP abundance or APP half-life in Dp1Tyb,  
178 Dp1Tyb/*App<sup>+/-</sup>* and WT MEFs, suggesting that trisomy of Hsa21-homologous genes  
179 on Mmu16 including *App* is not sufficient to increase APP protein level in this cellular  
180 model and that this dosage-insensitivity is not the result of an increase in the proteins  
181 degradation rate (**Fig. 3 A-C**).

182

183 **Three-copies of Hsa21 mouse homologues in the Dp1Tyb region do not alter**  
184 **amyloid- $\beta$  production or peptide ratios**

185 Trisomy of genes on Hsa21 other than *App* can modulate the ratio of amyloid- $\beta$  in vivo  
186 [2]. Levels of amyloid- $\beta$  produced from the endogenous *App* gene were below the limit



187 of detection in MEF culture media; thus, to determine if peptide ratios were altered we  
188 transfected MEFs with a  $\beta$ CTF-3xFLAG plasmid to overexpress APP- $\beta$ -CTF and we  
189 quantified amyloid- $\beta$ . The absolute concentrations of amyloid- $\beta_{40}$  and amyloid- $\beta_{42}$  and  
190 the ratio of the two peptides were not altered (N = 3) (**Fig 4A-C**). amyloid- $\beta_{38}$  levels  
191 were below the limit of detection and were not analysed.

192

193

## 194 **Discussion**

195

196 Here we compared the biology of early endosomes and APP in MEFs isolated from  
197 the Dp1Tyb and Dp2Tyb mouse models to determine if this system can be used to  
198 investigate the Hsa21 genes responsible for the changes to early endosomes and  
199 APP biology that occur in DS. Moreover, the workflow described here may be useful  
200 for the systematic quantification of RAB5<sup>+</sup> endosome size and number in other cellular  
201 models as an alternative to the use of electron microscopy. We found that this DS  
202 MEF model did not recapitulate endosomal enlargement, likely because of the dosage  
203 insensitivity of *App* in this system. This is consistent with a previous report that showed  
204 raised levels of the *App* gene product  $\beta$ -CTF are necessary for DS-associated  
205 endosomal enlargement [40].

206

207 MEFs are embryonic peripheral cells and further changes to biology may be observed  
208 in neuronal cells or in the context of aging. However, cellular dysfunction including in  
209 the endo-lysosomal system occurs in iPSCs, organoids, fibroblasts and  
210 lymphoblastoid cells isolated from individuals with DS [14,16,23,41]. Future research  
211 could quantify APP expression in Dp1Tyb primary neurons to determine whether the

212 lack of *App* dosage sensitivity in MEFs is a result of the embryonic origin of the cells  
213 or because of cell-type specific biology. Previous studies have been inconsistent on  
214 the dose sensitivity of *APP* in different tissues and models, suggesting that *APP*  
215 production is tightly regulated [42–44]. Since three copies of *APP* are sufficient for AD  
216 development and *APP* is the precursor of amyloid- $\beta$  [1], studying the regulation of *APP*  
217 expression in different tissues and over time could be pivotal to gain further  
218 understanding of AD.

219

220 To further investigate *APP* processing *in vitro* we determined the ratio of amyloid- $\beta_{40}$   
221 and amyloid- $\beta_{42}$  peptides and their absolute abundances in MEFs transfected with  
222 human  $\beta$ -CTF. The amyloid- $\beta_{40}$ /amyloid- $\beta_{42}$  ratio was not altered in Dp1Tyb or  
223 Dp1Tyb/*App*<sup>+/-</sup> MEFs compared to WT controls. This suggests that the additional copy  
224 of genes in this region is not sufficient to modulate the processing of *APP*-CTF to form  
225 amyloid- $\beta$  in fibroblasts. Alić et al. (2020) observed that organoids trisomic for Hsa21  
226 also failed to show an alteration in amyloid- $\beta_{40}$ /amyloid- $\beta_{42}$  ratio, but the authors  
227 observed an increase in the absolute concentration of amyloid- $\beta_{40}$  and amyloid- $\beta_{42}$   
228 produced, together with an increase in total *APP* which we did not observe in our  
229 mouse derived model system. Future research could use brain tissue from Dp1Tyb  
230 and Dp2Tyb mice to verify that *APP*, amyloid- $\beta_{40}$  and amyloid- $\beta_{42}$  abundance is  
231 increased in the mouse model and the lack of dosage sensitivity is a feature of MEFs.  
232 Use of brain tissue at different time points could enable investigation of the progressive  
233 changes over life-span, which cannot be investigated using primary cells. In addition,  
234 both Dp1Tyb and Dp2Tyb mouse models contain three copies of a number of mouse  
235 homologous chromosome 21 genes, which make them more physiologically relevant  
236 than single-gene transgenic models [45].

237 In conclusion, alternative models to the MEF system investigated here are required to  
238 understand how additional copies of genes on Hsa21 change endo-lysosomal and  
239 APP biology. These biological processes are proposed to underlie the early  
240 development of AD in people who have DS and the identification of alternative model  
241 systems will further understanding of this important research area.

242

243

## 244 **Material and methods**

245

### 246 **Mouse breeding and husbandry**

247

248 This study was conducted in accordance with ARRIVE2.0 [46]. The mice involved in  
249 this study were housed in controlled conditions in accordance with Medical Research  
250 Council guidance (*Responsibility in the Use of Animals for Medical Research*, 1993),  
251 and experiments were approved by the Local Ethical Review panel (MRC Prion Unit,  
252 University College London) and conducted under License from the UK Home Office,  
253 according to the revised Animals (Scientific Procedures) Act 1986.

254

255 Cage groups and genotypes were pseudo-randomised, with a minimum of two mice  
256 and a maximum of five in each cage; groups were weaned with members of the same  
257 sex. Mouse houses, bedding and wood chips, and continual access to water were  
258 available to all mice, with RM1 and RM3 chow (Special Diet Services, UK) provided to  
259 breeding and stock mice, respectively. The water provided was reversed osmosis (RO  
260 water). Cages were individually ventilated in a specific pathogen-free facility. Mouse  
261 used to generate the breeding stock for this study were euthanised by exposure to a

262 rising concentration of CO<sub>2</sub> gas followed by confirmation of death by dislocation of the  
263 neck, according to the revised Animals (Scientific Procedures) Act 1986. The animal  
264 facility was maintained at a constant temperature of 19-23°C with 55 ± 10 % humidity  
265 in a 12 h light/dark cycle.

266

267 Dp(16Lipi-Dbtb21)1TybEmcf [Dp1Tyb] (MGI:5703853) and  
268 Dp(16Mis18aRunx1)2TybEmcf [Dp2Tyb] (MGI:5703854) mice were imported from the  
269 Francis Crick Institute and colonies were maintained by backcrossing to C56BL/6J.  
270 B6.129S7-*App*<sup>tm1Dbo</sup>/J [*App*<sup>+/-</sup>] (MGI:2136847) mice were imported from the Jackson  
271 Laboratory and the colony was maintained by crossing heterozygous knockouts with  
272 C57BL/6J animals. To generate progeny for the MEFs used in this project Dp1Tyb  
273 mice were crossed with *App*<sup>+/-</sup> or C57BL/6J mice; Dp2Tyb mice were maintained by  
274 crossing with C57BL/6J animals. Dp1Tyb, Dp2Tyb, *App*<sup>+/-</sup> colonies were fully inbred  
275 for >10 generations on the C57BL/6J genetic background.

276

### 277 **Mouse embryonic fibroblasts (MEFs)**

278 Mouse Embryonic Fibroblasts were generated from timed matings; at E14 pregnant  
279 females and embryos were culled by a schedule one method. Briefly, the pregnant  
280 female mouse in the mating was euthanized, and dissection for the collected embryos  
281 was carried out under sterile condition in a laminar flow hood. The uterine horn was  
282 dissected and rinsed in 70 % ethanol (v/v) and placed into a 100 mm Petri dish. Each  
283 embryo was separated from its placenta and embryonic sac. The embryo was  
284 decapitated and the head and body were transferred to a 1.5 ml Eppendorf tube  
285 containing PBS and delivered for genotyping (heads) and MEF generation (bodies).  
286 Red organs were removed from embryo bodies and remaining tissue was minced with

287 0.25 % trypsin-EDTA prior to dissociation by pipetting, cells were isolated by  
288 centrifugation and plated on 0.1 % gelatin-coated plates in DMEM + GlutaMax, 10 %  
289 FBS and 1 % Penicillin-streptomycin (culture at 37°C in 5 % CO<sub>2</sub>).

290

### 291 **Genotyping**

292 Genotyping of Dp1Tyb, Dp2Tyb, *App*<sup>+/-</sup>, and Dp1Tyb/*App*<sup>+/-</sup> mice was outsourced to  
293 TransnetYX (Cordova TN, USA) using a proprietary qPCR-based system.

294

### 295 **Generation of the βCTF-3xFLAG plasmid, the GFP-Rab5CA plasmid and** 296 **nucleofection**

297 Briefly, the β-CTF sequence was amplified from a βCTF-EGFP plasmid (kind gift of Dr  
298 Jiang (New York University, USA), then ligated into a pCI-Neo vector. Then the APP  
299 signal peptide sequence was ligated into the 5' region and the 3xFLAG into the 3'  
300 region. GFP-Rab5CA (Q79L) (RAB5CA), was a kind gift from Sergio Grinstein sourced  
301 from Addgene (Addgene plasmid # 35140 ; <http://n2t.net/addgene:35140> ;  
302 RRID:Addgene\_35140 [37]). These plasmids were transfected into TOP10 competent  
303 cells under ampicillin selection and DNA was prepared from cultures with a QIAprep  
304 Spin Miniprep Kit (QIAGEN) according to manufacturer's instructions. An Amaxa  
305 Nucleofector 2b Device and a Mouse Embryonic Fibroblast Nucleofector Kit 1 (Lonza)  
306 were used to transfect MEFs with βCTF-3xFLAG plasmid using program N-024 of the  
307 Nucleofector (**Supplementary Figure 3**).

308

### 309 **Cycloheximide pulse chase**

310 13 h after plating, MEF media was changed and cycloheximide solution (30 μg/ml per  
311 well) or ddH<sub>2</sub>O (negative control) were added. Cells were collected at 6 timepoints

312 from cycloheximide addition: 0 h, 15 min, 30 min, 1 h, 2 h, 4 h in ice-cold RIPA buffer  
313 (150 mM sodium chloride, 50 mM Trizma hydrochloride, 1 % NP-40, 0.5 % sodium  
314 deoxycholate, 0.1 % SDS) + 1:100 protease inhibitor (Protease inhibitor cocktail I).  
315 The cell suspension was centrifuged for 15 min at 24 000 rcf at 4°C. APP abundance  
316 at each timepoint was normalized to the value at time 0 h. Half-life was calculated  
317 using the One Phase Decay (nonlinear regression) function on GraphPad Prism. The  
318 values obtained for each technical repeat (i.e. gel) were averaged together to obtain  
319 one half-life value per genotype per experimental repeat, such that independent  
320 biological replicates were used as the experimental unit. These values were then  
321 compared with a one-way ANOVA test on GraphPad Prism.

322

### 323 **A $\beta$ peptides measure**

324 The Mesoscale amyloid- $\beta$  6E10 Triplex Assay (Meso Scale Discovery, MSD) was  
325 used to determine the concentration of amyloid- $\beta$  isoforms (amyloid- $\beta_{38}$ , amyloid- $\beta_{40}$ ,  
326 amyloid- $\beta_{42}$ ) in media collected from MEFs and diluted 1:2 in Dilutor 35. A MESO  
327 SECTOR S 600 plate reader (MSD) was used to read the plate.

328

### 329 **Western blotting**

330 Pierce 660nm Protein Assay Reagent was used to measure protein concentrations  
331 using a standard of Bovine Serum Albumin (BSA) in PBS (3000 – 0  $\mu$ g/ml). Samples  
332 were denatured in NuPAGE LDS 4X and 2-mercaptoethanol by boiling at 95°C for 5  
333 min. Bolt 4-12 % Bis-Tris Plus Gels and Bolt MES SDS Running Buffer 20X were used  
334 for protein separation before transfer to nitrocellulose membranes (Transblot Turbo  
335 Transfer Pack, Bio-Rad) using a Transblot Turbo 0.2  $\mu$ m (Bio-Rad). Proteins were  
336 blocked in 5 % skimmed milk in PBS prior to incubation with primary antibody (anti-

337 APP A8717 1:5000 Sigma Aldrich) at 4°C overnight prior to incubation with anti-rabbit  
338 HRP. Membranes were developed using Super Signal West Pico Chemiluminescent  
339 Substrate. ImageJ was used to quantify the signal from bands and the linearity of APP  
340 signal was confirmed by western blot of endogenous APP (doubling-dilutions).

341

### 342 **Immunocytochemistry**

343 Cells were washed in PBS then fixed in 4 % PFA for 20 min prior to permeabilization  
344 with 0.05 % saponin/PBS for 10 min. Cells were blocked with 5 % BSA/PBS for 1 h  
345 before overnight incubation with primary antibodies in 1 % BSA/PBS (RAB5 21435  
346 1:200 Cell Signalling and anti-Integrin-β1 MAB1997 1:1000, Millipore) at 4°C prior to  
347 washing and incubation with secondary antibodies (anti-rabbit AlexaFluor-546 [A11-  
348 35] and anti-mouse AlexaFluor-633 [A21052] Thermofisher) in 1 % BSA/PBS. Cells  
349 were mounted on SuperFrost adhesion slides (VWR International) with ProlongGold  
350 + DAPI.

351

### 352 **Imaging**

353 Images were taken on Confocal microscopes Zeiss Observer LSM800 or Zeiss  
354 Examiner LSM880. Each image was taken with a 63x1.4 Oil Plan Apochromat  
355 objective in two channels. Z-stacks at 150 nm interval between slices were taken to  
356 include the whole cell. Pixel size was equal to x, y = 0.05 μm, z = 0.15 μm. The pinhole  
357 size was equal to 1 Airy Unit of the 546 channel. Deconvolution for RAB5 signal was  
358 performed with Huygens software signal/noise ratio = 15. ImageJ software was used  
359 to clear the space surrounding the cells and to measure their volume. Briefly, the  
360 surface of the cell was smoothed and thresholded in 3D; everything outside the cell  
361 was cleared, using a custom macro (supplementary Fig 4). Imaris software was used

362 to build a 3D reconstruction of the staining after deconvolution. Objects were identified  
363 using the surfaces function, with smoothing disabled and thresholding with  
364 background subtraction using default settings. This allowed us to make an accurate  
365 measurement of a large number of endosomes in three dimensions. Volume data were  
366 generated by the software and imported in excel. Endosomal volume ( $\mu\text{m}^3$ ) was used  
367 to calculate endosomal size. The size parameters of endosomes between the 50 and  
368 90 percentiles were determined in WT MEFs transfected with PBS, and this  
369 information was used to classified endosomes in small (0-50 percentile), medium (50-  
370 90 percentile) and large (90-100 percentile) bins. A nested ANOVA was used to  
371 compare the size of large endosomes in MEFs transfected with PBS vs RAB5.

372

### 373 **Experimental Design and Statistical analysis**

374 Sample size was determined with either a power calculation using pilot data (Dp1Tyb)  
375 or based on sample availability (Dp2Tyb). Sample order in all experiments (including  
376 during culture, western blotting and MSD assay) was randomized but balanced by  
377 genotype. All experiments and data analysis undertaken blind to genotype. All  
378 statistical tests were performed with IBM SPSS Statistics Version 2.5 and GraphPad  
379 Prism Version 8.4.2. All data is reported as mean  $\pm$  SEM. All data was checked for  
380 normality of distribution and homogeneity of samples; sample distribution was tested  
381 with a Levene's test, and data normality was tested with a Kolmogorov-Smirnov test.  
382 If the assumptions of normality and homogeneity of variance were verified, parametric  
383 tests were used to analyse data; otherwise non-parametric tests were used. For each  
384 experiment, the effect of genotype and sex was assessed using a multivariate ANOVA  
385 test. If the effect of one or more of the variables was significant, the variable was tested  
386 separately using ANOVA test, t-test or their non-parametric equivalents.



387

## 388 **Acknowledgements and Funding**

389 C.C. was funded by an Alzheimer's Society PhD studentship (AS-PhD-16-003 2017-  
390 20) awarded to F.K.W and E.M.C.F. F.K.W holds an Alzheimer's Research UK Senior  
391 Research Fellowship (ARUK-SRF2018A-001). F.K.W. is also supported by the UK  
392 Dementia Research Institute (UKRI-1014) which receives its funding from DRI Ltd,  
393 funded by the UK Medical Research Council, Alzheimer's Society and Alzheimer's  
394 Research UK. F.K.W. and E.M.C.F. also received funding that contributed to the work  
395 in this paper from the MRC via CoEN award MR/S005145/1. E.M.C.F. received  
396 funding from a Wellcome Trust Strategic Award (grant number: 098330/Z/12/Z)  
397 awarded to The London Down Syndrome (LonDownS) Consortium and a Wellcome  
398 Trust Joint Senior Investigators Award (grant numbers: 098328, 098327). DM is  
399 supported by NIHR GOSH BRC award 17DD08. The funders had no role in study  
400 design, data collection and analysis, decision to publish, or preparation of the  
401 manuscript. For the purpose of Open Access, the author has applied a CC-BY public  
402 copyright licence to any Author Accepted Manuscript version arising from this  
403 submission.

404

405 The LonDownS Consortium comprises Andre Strydom ([andre.strydom@kcl.ac.uk](mailto:andre.strydom@kcl.ac.uk))<sup>1,2</sup>,  
406 Elizabeth M.C. Fisher<sup>3</sup>, Frances K. Wiseman<sup>4</sup>, Dean Nizetic<sup>5,6</sup>, John Hardy<sup>4,7</sup>, Victor  
407 L. J. Tybulewicz<sup>8,9</sup> and Annette Karmiloff-Smith<sup>10</sup>. <sup>1</sup>Department of Forensic and  
408 Neurodevelopmental Sciences, Institute of Psychiatry, Psychology and Neuroscience,  
409 King's College London, London, UK. <sup>2</sup>Division of Psychiatry, University College  
410 London, London, UK. <sup>3</sup>Department of Neuromuscular Diseases, Queen Square  
411 Institute of Neurology, University College London, Queen Square, London, UK. <sup>4</sup>The

412 UK Dementia Research Institute, University College London, Queen Square, London,  
413 UK. <sup>5</sup>Blizard Institute, Barts and the London School of Medicine, Queen Mary  
414 University of London, London, UK. <sup>6</sup>Lee Kong Chian School of Medicine, Nanyang  
415 Technological University, Singapore, Singapore. <sup>7</sup>Reta Lila Weston Institute, Institute  
416 of Neurology, University College London, London, London, UK. <sup>8</sup>The Francis Crick  
417 Institute, London, UK. <sup>9</sup>Department of Immunology and Inflammation, Imperial College,  
418 London, UK. <sup>10</sup>Birkbeck University, London, UK.

419

420 We thank Amanda Heslegrave (UCL-DRI) for assistance with this project.

421

422 F.K.W. has undertaken consultancy for Elkington and Fife Patent Lawyers unrelated  
423 to the work in the manuscript and is also a PLoS One Academic Editor. This does not  
424 alter our adherence to PLoS One policies on sharing data or materials.

426 **Figure legends**

427

428 **Figure 1.** *Number of endosomes per cell is not different in WT and Dp1Tyb or Dp2Tyb*  
429 *MEFs. A)* Schematic of gene content of Dp1Tyb and Dp2Tyb mouse models **B)** No  
430 difference was found in the number of RAB5<sup>+</sup> endosomes (normalised to cell volume)  
431 in WT and Dp1Tyb MEFs (Nested t-test  $p = 0.83$ ,  $N = 5$  biological repeats,  $N = 3-5$  of  
432 technical repeats). **C)** No difference was found in the number of RAB5<sup>+</sup> endosomes  
433 (normalised to cell volume) in WT and Dp2Tyb MEF (Nested t-test,  $p = 0.08$ ,  $N = 2$   
434 biological repeats (independent MEF lines),  $N = 6$  technical repeats). *Error bars = SEM.*

435

436

437 **Figure 2.** *Endosomal volume distribution and mean volume of the largest endosomes*  
438 *are not different in WT and Dp1Tyb or Dp2Tyb MEFs.* Endosomes were binned in  
439 three size categories: small (0-50 percentile of WT MEFs), medium (50-90 percentile  
440 of WT MEFs) and large (90-100 percentile of WT MEFs). The categories were  
441 determined using the endosomes in WT MEFs. **A)** No difference in RAB5<sup>+</sup> endosome  
442 volume distribution was observed in WT and Dp1Tyb MEFs (Mann-Whitney U test).  $N$   
443  $= 5$  biological repeats,  $N = 3-5$  of technical repeats. **B)** No difference in RAB5<sup>+</sup>  
444 endosome volume distribution was observed in WT and Dp2Tyb MEFs (Mann-Whitney  
445 U test).  $N = 2$  biological repeats,  $N = 6$  technical repeats. **C)** Volume of the RAB5<sup>+</sup>  
446 endosomes classified as 'large' is not different in WT and Dp1Tyb MEFs (Nested t-  
447 test,  $p = 0.21$ ).  $N = 5$  of biological repeats (independent MEF lines),  $N = 3-5$  of technical  
448 repeats. **D)** Volume of the RAB5<sup>+</sup> endosomes classified as 'large' is not different in WT  
449 and Dp2Tyb MEFs (Nested t-test,  $p = 0.31$   $N = 2$  biological repeats (independent MEF  
450 lines),  $N = 6$  technical repeats). *Error bars = SEM.*

451

452

453 **Figure 3.** *Trisomy of Hsa21-homologous genes including or excluding App does not*  
454 *affect APP half-life in MEFs. A)* Degradation curve of APP in Dp1Tyb, Dp1Tyb/*App*<sup>+/-</sup>  
455 and WT MEFs. **B)** Half-life of APP is not significantly different in Dp1Tyb,  
456 Dp1Tyb/*App*<sup>+/-</sup> and WT MEFs (One-way ANOVA,  $p = 0.48$ ,  $N = 5/6$ ). Average APP  
457 half-life in minutes: Dp1Tyb =  $84 \pm 9$ ; Dp1Tyb/*App*<sup>+/-</sup> =  $97 \pm 17$ ; WT =  $77 \pm 6$ ). **C)** APP  
458 abundance is not significantly different in Dp1Tyb, Dp1Tyb/*App*<sup>+/-</sup> and WT MEFs (One-  
459 way ANOVA,  $p = 0.77$ ,  $N = 6$ ). Average APP/ $\beta$ -actin: Dp1Tyb =  $0.93 \pm 0.07$ ;  
460 Dp1Tyb/*App*<sup>+/-</sup> =  $0.83 \pm 0.1$ ; WT =  $0.93 \pm 0.15$ ). Each dot corresponds to a biological  
461 repeat (i.e. an independent MEF line used). For each biological repeat, three technical  
462 repeats (i.e. western blot) were performed. Error bars = SEM. All full uncropped  
463 western blots are available at Figshare.

464

465

466 **Figure 4.** *Trisomy of Hsa21-homologous genes, including or excluding App, does not*  
467 *affect A $\beta$ 40/A $\beta$ 42 ratio.* In WT, Dp1Tyb and Dp1Tyb/*App*<sup>+/-</sup> MEFs overexpressing  
468 APP- $\beta$ -CTF led to no difference in **A)** A $\beta$ 40 abundance (Dp1Tyb =  $134.9 \pm 42.5$ ;  
469 Dp1Tyb/*App*<sup>+/-</sup> =  $138.2 \pm 47.75$ ; WT =  $154.1 \pm 76.59$ . One-way ANOVA,  $p = 0.97$ ,  $N =$   
470  $3$ ); **B)** A $\beta$ 42 abundance (Dp1Tyb =  $7.78 \pm 2.5$ ; Dp1Tyb/*App*<sup>+/-</sup> =  $7.56 \pm 2.88$ ; WT =  $9.02$   
471  $\pm 4.61$  in pg/ml. One-way ANOVA,  $p = 0.95$ ,  $N = 3$ ) or **C)** A $\beta$ 40/A $\beta$ 42 ratio (Dp1Tyb =  
472  $17.51 \pm 0.24$ ; Dp1Tyb/*App*<sup>+/-</sup> =  $19.29 \pm 1.37$ ; WT =  $17.38 \pm 0.31$ . One-way ANOVA,  $p$   
473 =  $0.26$ ,  $N = 3$ ). Each dot corresponds to a biological repeat using an independent MEF  
474 lines. Error bars = SEM.

475

476 **Supplementary Figure 1** *Process of quantification of RAB5<sup>+</sup> endosomal staining. A)*

477 WT MEF stained for Integrin $\beta$  (cell membrane, green) and RAB5 (endosomes, red).

478 **B, D)** Endosomal staining after deconvolution and background clearance **C, E)** 3D

479 reconstruction of endosomal staining. Deconvolution and 3D reconstruction to

480 accurately quantify the volume of endosomes. Z-stacks of each cell were taken with

481 150 nm interval between slices and fixed voxel volume (x = 50 nm, y = 50 nm, z = 150

482 nm) on confocal microscopes LSM800 or LSM880. Each stack was deconvolved using

483 Huygens software to improve image signal to noise and resolution. ImageJ software

484 was used to remove the background with a macro written by Dr Dale Moulding. Imaris

485 software was used to reconstruct the deconvolved staining in 3D. The area of Integrin $\beta$

486 was used to create a mask to define cellular volume.

487

488 **Supplementary Figure 2** **Distribution and quantification of endosomes in MEFs**

489 **transfected with PBS and RAB5CA. A)** The normal distribution of endosomal size in

490 WT MEFs transfected with PBS was determined to define the parameters for

491 classification of “large” endosomes (small: endosomes in the 0 – 50 percentile,

492 medium: endosomes in the 50 – 90 percentile, large: endosomes in the > 90

493 percentile). **B)** A nested t-test showed that ‘large’ endosomes in cells transfected with

494 RAB5CA had a significantly higher volume than the endosomes in cells transfected

495 with PBS ( $p = 0.007$ ,  $N = 3$  of biological repeats). *The dots indicate the average volume*

496 *of the ‘large’ endosomes in one cell imaged (technical repeat). Error bars = SEM.*

497

498 **Supplementary Figure 3** *Detail of the pCI-neo  $\beta$ CTF-3xFLAG plasmid map. The APP*

499 *signalling sequence was inserted in a pCI-neo plasmid followed by the  $\beta$ -CTF fragment*

500 of APP and by a 3xFLAG sequence. The primers used for sequencing the insert  
501 (*sequencing forward and reverse*) are also shown.

502

503 **Supplementary Figure 4 Custom ImageJ Macro.** Macro designed by Dr Dale  
504 Moulding to smooth the cell surface and clear its outside in 3D, enabling accurate  
505 quantification of the volume of the cell and of the number and volume of endosomes.

506

507 **Figure 1**

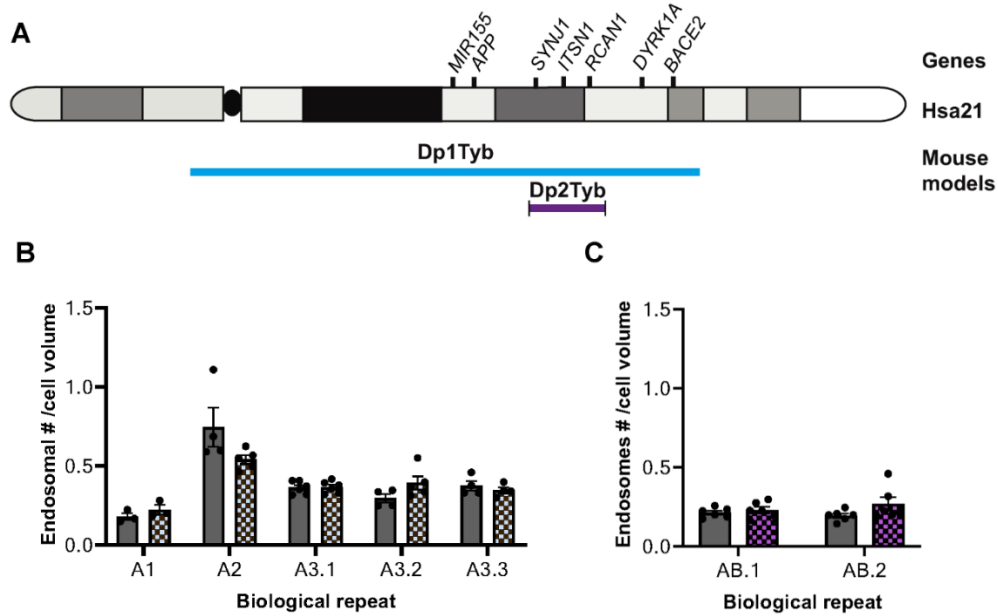

508  
509  
510

**Figure 2**

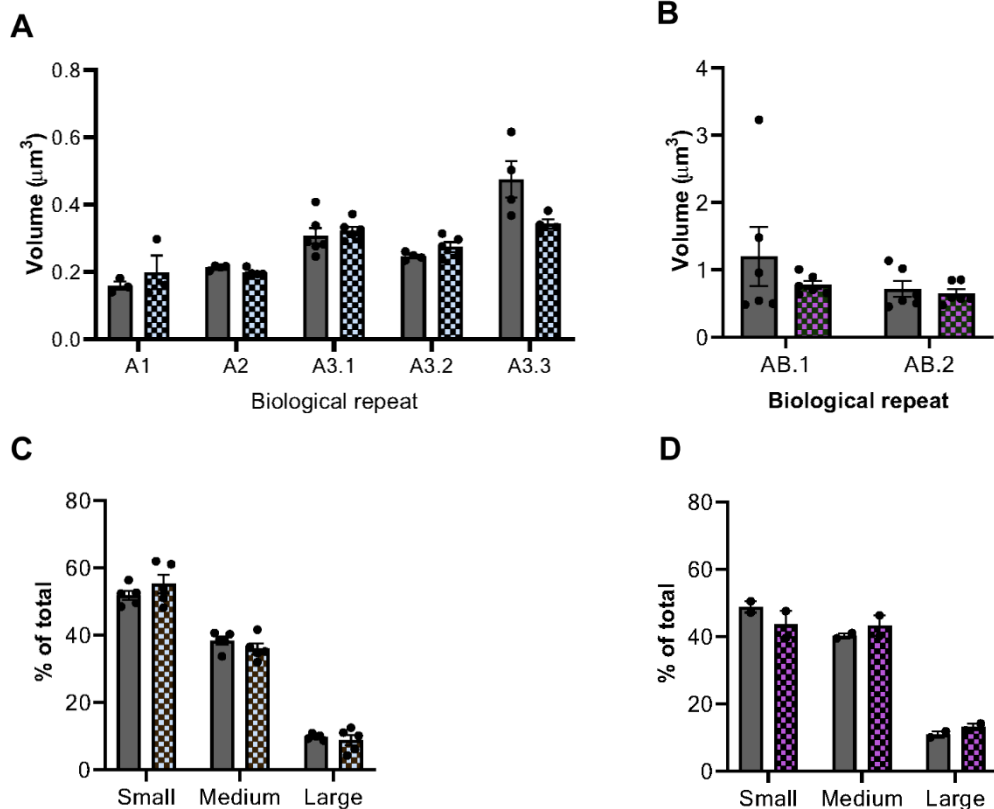

511  
512  
513  
514  
515  
516  
517

518 **Figure 3**  
**A**

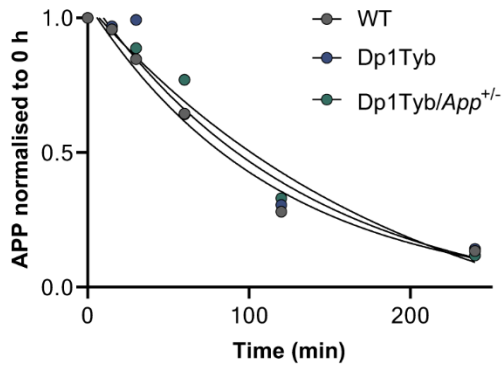

**B**

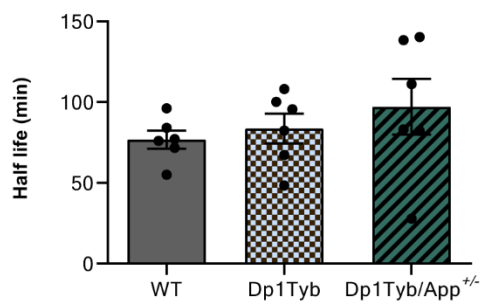

**C**

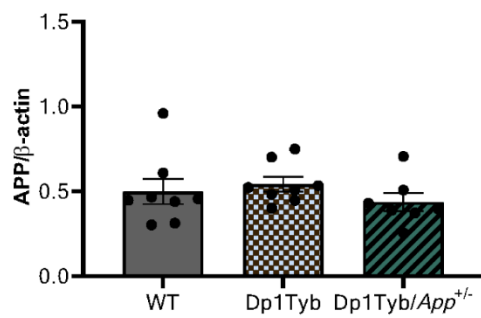

519  
520  
521

**Figure 4**

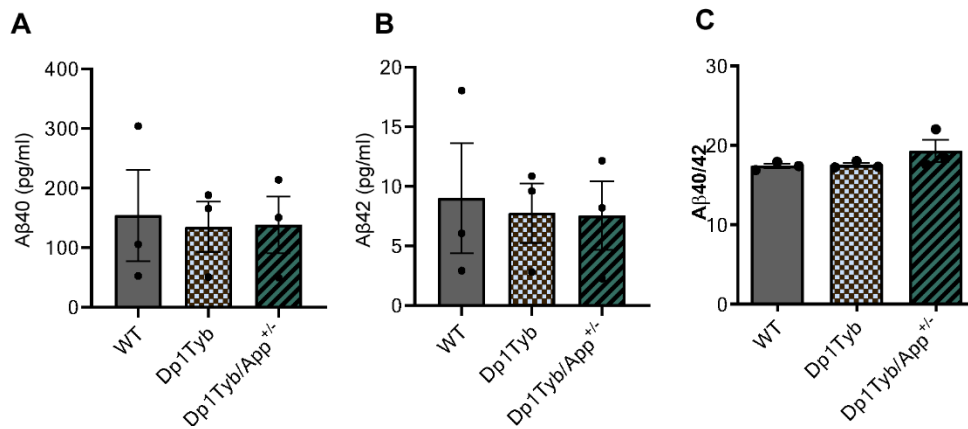

522  
523  
524  
525  
526



527 **Supplementary figure 1**

528  
529  
530  
531  
532  
533  
534  
535  
536  
537  
538  
539  
540  
541  
542  
543  
544  
545  
546  
547  
548  
549  
550  
551  
552  
553  
554  
555  
556  
557  
558  
559  
560  
561  
562  
563  
564  
565  
566  
567  
568  
569  
570  
571  
572  
573  
574  
575  
576

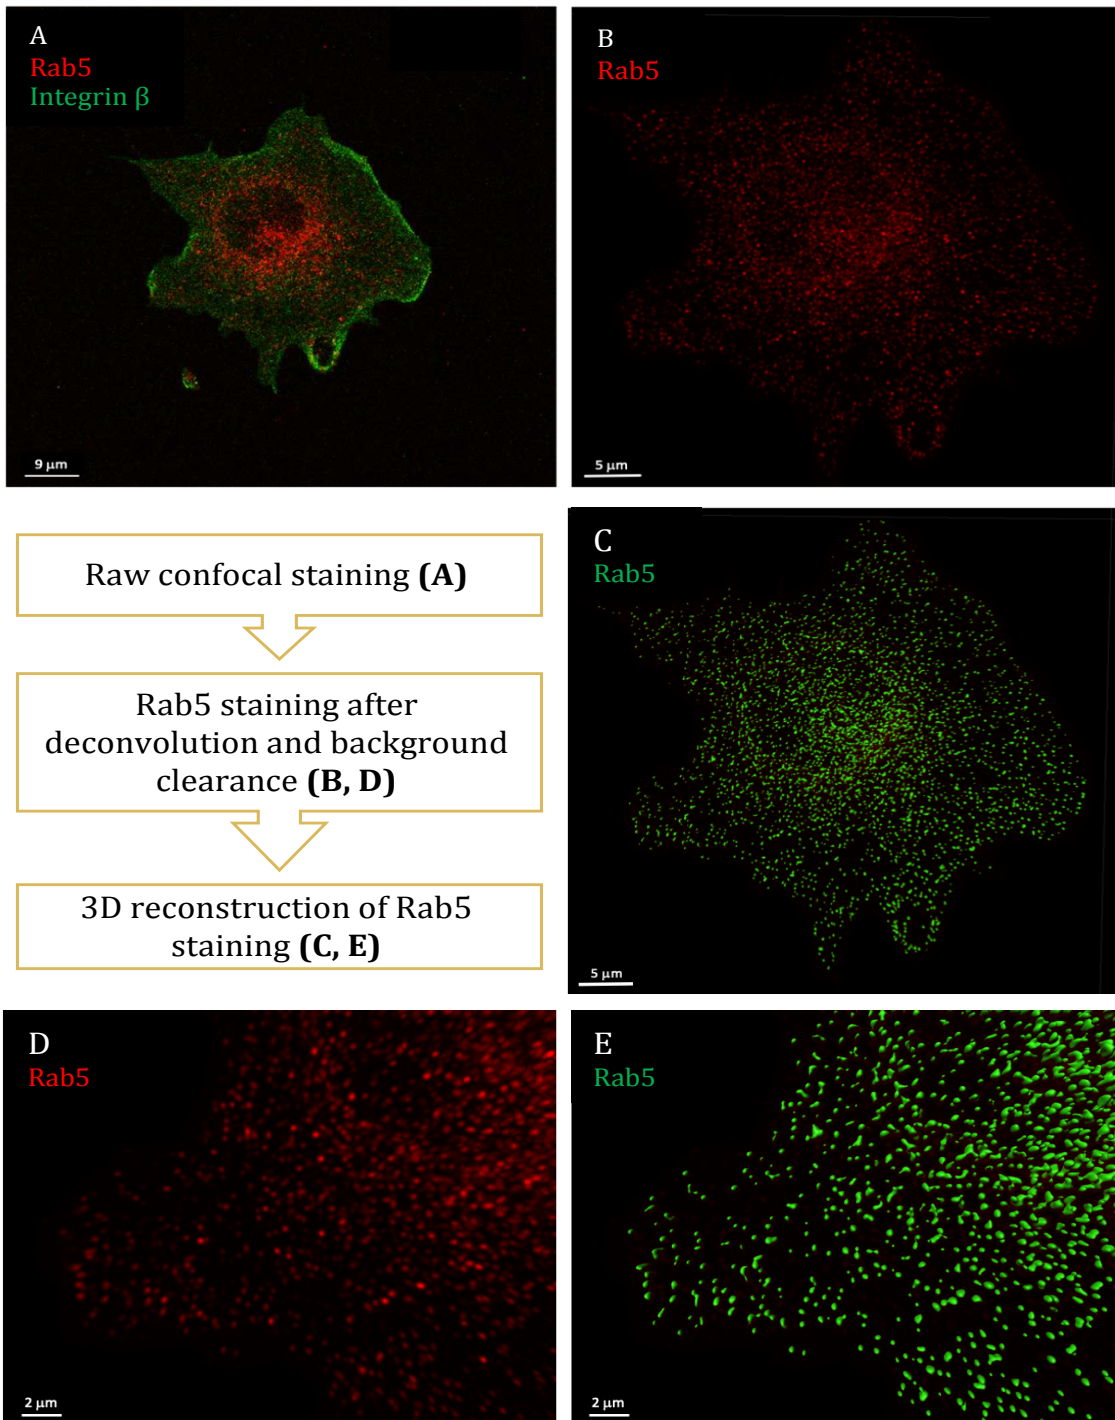

577 **Supplementary figure 2**

578

579

580

581

582

583

584

585

586

587

588

589

590

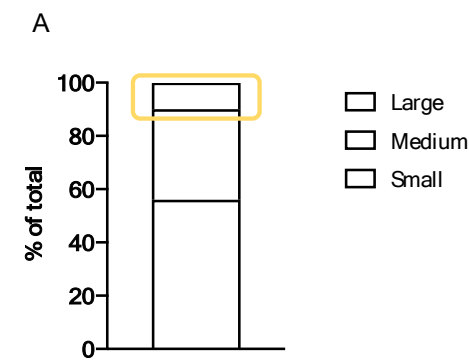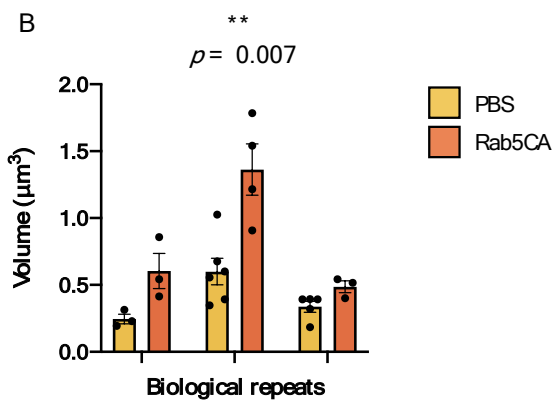

591 **Supplementary Figure 3**

592

593

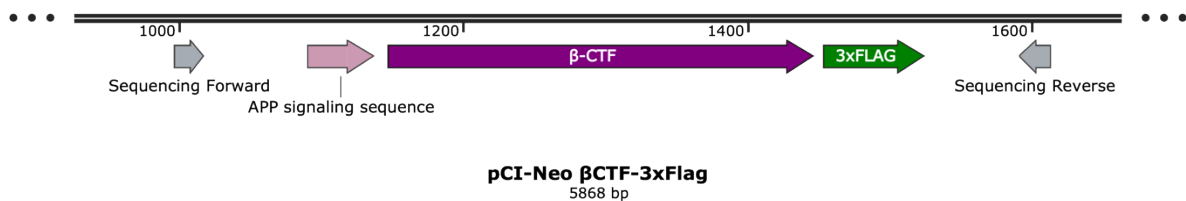

594

595

596 **Supplementary Figure 4**

597

598 Macro:

599 rename("Orig");

600 run("Split Channels");

601 selectWindow("C2-Orig");

602 run("Gaussian Blur 3D...", "x=2 y=2 z=2");

603 setAutoThreshold("Huang dark stack");

604 //run("Threshold...");

605 run("Convert to Mask", "method=Huang background=Dark");

606 run("Analyze Particles...", "size=3-Infinity show=Masks stack");

607 selectWindow("Mask of C2-Orig");

608 run("16-bit");

609 run("Divide...", "value=255 stack");

610 imageCalculator("Multiply create stack", "C1-Orig", "Mask of C2-Orig");

611

612

613

## 614 References

615

- 616 1. Wiseman FK, Al-Janabi T, Hardy J, Karmiloff-Smith A, Nizetic D, Tybulewicz  
617 VLJ, et al. A genetic cause of Alzheimer disease: Mechanistic insights from  
618 Down syndrome. *Nature Reviews Neuroscience*. 2015. pp. 564–574.  
619 doi:10.1038/nrn3983
- 620 2. Wiseman FK, Pulford LJ, Barkus C, Liao F, Portelius E, Webb R, et al. Trisomy  
621 of human chromosome 21 enhances amyloid- $\beta$  deposition independently of an  
622 extra copy of APP. *Brain*. 2018;141: 2457–2474. doi:10.1093/brain/awy159
- 623 3. Thinakaran G, Koo EH. Amyloid Precursor Protein Trafficking, Processing, and  
624 Function. *J Biol Chem*. 2008;283: 29615–29619. doi:10.1074/jbc.R800019200
- 625 4. Jiang S, Li Y, Zhang X, Bu G, Xu H, Zhang YW. Trafficking regulation of  
626 proteins in Alzheimer’s disease. *Molecular Neurodegeneration*. BioMed  
627 Central; 2014. p. 6. doi:10.1186/1750-1326-9-6
- 628 5. Haass C, Kaether C, Thinakaran G, Sisodia S. Trafficking and proteolytic  
629 processing of APP. *Cold Spring Harb Perspect Med*. 2012;2.  
630 doi:10.1101/cshperspect.a006270
- 631 6. Plácido AI, Pereira CMF, Duarte AI, Candeias E, Correia SC, Santos RX, et al.  
632 The role of endoplasmic reticulum in amyloid precursor protein processing and  
633 trafficking: Implications for Alzheimer’s disease. *Biochim Biophys Acta - Mol*  
634 *Basis Dis*. 2014;1842: 1444–1453. doi:10.1016/J.BBADIS.2014.05.003
- 635 7. Perez RG, Soriano S, Hayes JD, Ostaszewski B, Xia W, Selkoe DJ, et al.  
636 Mutagenesis identifies new signals for  $\beta$ -amyloid precursor protein  
637 endocytosis, turnover, and the generation of secreted fragments, including  
638 A $\beta$ 42. *J Biol Chem*. 1999;274: 18851–18856. doi:10.1074/jbc.274.27.18851
- 639 8. Kaether C, Schmitt S, Willem M, Haass C. Amyloid precursor protein and  
640 Notch intracellular domains are generated after transport of their precursors to  
641 the cell surface. *Traffic*. 2006;7: 408–415. doi:10.1111/j.1600-  
642 0854.2006.00396.x
- 643 9. Das U, Wang L, Ganguly A, Saikia JM, Wagner SL, Koo EH, et al. Visualizing  
644 APP and BACE-1 approximation in neurons yields insight into the  
645 amyloidogenic pathway. *Nat Neurosci*. 2015;19: 55–64. doi:10.1038/nn.4188
- 646 10. Cataldo AM, Barnett JL, Pieroni C, Nixon RA. Increased neuronal endocytosis  
647 and protease delivery to early endosomes in sporadic Alzheimer’s disease:  
648 neuropathologic evidence for a mechanism of increased beta-  
649 amyloidogenesis. *J Neurosci*. 1997;17: 6142–51. Available:  
650 <http://www.ncbi.nlm.nih.gov/pubmed/9236226>
- 651 11. Cataldo AM, Peterhoff CM, Troncoso JC, Gomez-Isla T, Hyman BT, Nixon RA.  
652 Endocytic pathway abnormalities precede amyloid  $\beta$  deposition in sporadic  
653 alzheimer’s disease and down syndrome: Differential effects of APOE  
654 genotype and presenilin mutations. *Am J Pathol*. 2000;157: 277–286.  
655 doi:10.1016/S0002-9440(10)64538-5
- 656 12. Small SA, Petsko GA. Endosomal recycling reconciles the Alzheimer’s disease  
657 paradox. *Sci Transl Med*. 2020;12. doi:10.1126/SCITRANSLMED.ABB1717
- 658 13. Cataldo AM, Barnett JL, Pieroni C, Nixon RA. Increased neuronal endocytosis  
659 and protease delivery to early endosomes in sporadic Alzheimer’s disease:  
660 Neuropathologic evidence for a mechanism of increased  $\beta$ -amyloidogenesis. *J*  
661 *Neurosci*. 1997;17: 6142–6151. doi:10.1523/jneurosci.17-16-06142.1997
- 662 14. Cataldo AM, Mathews PM, Boiteau AB, Hassinger LC, Peterhoff CM, Jiang Y,  
663 et al. Down syndrome fibroblast model of Alzheimer-related endosome

- 664 pathology: Accelerated endocytosis promotes late endocytic defects. *Am J*  
665 *Pathol.* 2008;173: 370–384. doi:10.2353/ajpath.2008.071053
- 666 15. Israel MA, Yuan SH, Bardy C, Reyna SM, Mu Y, Herrera C, et al. Probing  
667 sporadic and familial Alzheimer's disease using induced pluripotent stem cells.  
668 *Nature.* 2012;482: 216–220. doi:10.1038/nature10821
- 669 16. Raja WK, Mungenast AE, Lin YT, Ko T, Abdurrob F, Seo J, et al. Self-  
670 organizing 3D human neural tissue derived from induced pluripotent stem cells  
671 recapitulate Alzheimer's disease phenotypes. *PLoS One.* 2016;11.  
672 doi:10.1371/journal.pone.0161969
- 673 17. Alić I, Goh PA, Murray A, Portelius E, Gkanatsiou E, Gough G, et al. Patient-  
674 specific Alzheimer-like pathology in trisomy 21 cerebral organoids reveals  
675 BACE2 as a gene dose-sensitive AD suppressor in human brain. *Mol*  
676 *Psychiatry.* 2020 [cited 19 Jul 2020]. doi:10.1038/s41380-020-0806-5
- 677 18. Cataldo AM, Petanceska S, Peterhoff CM, Terio NB, Epstein CJ, Villar A, et al.  
678 App gene dosage modulates endosomal abnormalities of Alzheimer's disease  
679 in a segmental trisomy 16 mouse model of Down syndrome. *J Neurosci.*  
680 2003;23: 6788–6792. doi:10.1523/jneurosci.23-17-06788.2003
- 681 19. Botté A, Lainé J, Xicota L, Heiligenstein X, Fontaine G, Kasri A, et al.  
682 Ultrastructural and dynamic studies of the endosomal compartment in down  
683 syndrome. *Acta Neuropathol Commun.* 2020;8. doi:10.1186/s40478-020-  
684 00956-z
- 685 20. Klumperman J, Raposo G. The complex ultrastructure of the endolysosomal  
686 system. *Cold Spring Harb Perspect Biol.* 2014;6.  
687 doi:10.1101/cshperspect.a016857
- 688 21. Jiang Y, Rigoglioso A, Peterhoff CM, Pawlik M, Sato Y, Bleiwas C, et al. Partial  
689 BACE1 reduction in a Down syndrome mouse model blocks Alzheimer-related  
690 endosomal anomalies and cholinergic neurodegeneration: Role of APP-CTF.  
691 *Neurobiol Aging.* 2016;39: 90–98. doi:10.1016/j.neurobiolaging.2015.11.013
- 692 22. Xu W, Weissmiller AM, White JA, Fang F, Wang X, Wu Y, et al. Amyloid  
693 precursor protein-mediated endocytic pathway disruption induces axonal  
694 dysfunction and neurodegeneration. *J Clin Invest.* 2016;126: 1815–1833.  
695 doi:10.1172/JCI82409
- 696 23. Cossec JC, Lavour J, Berman DE, Rivals I, Hoischen A, Stora S, et al. Trisomy  
697 for synaptotagmin1 in down syndrome is functionally linked to the enlargement of  
698 early endosomes. *Hum Mol Genet.* 2012;21: 3156–3172.  
699 doi:10.1093/hmg/ddc142
- 700 24. Yu Y, Chu PY, Bowser DN, Keating DJ, Dubach D, Harper I, et al. Mice  
701 deficient for the chromosome 21 ortholog *Itsn1* exhibit vesicle-trafficking  
702 abnormalities. *Hum Mol Genet.* 2008;17: 3281–3290. doi:10.1093/hmg/ddn224
- 703 25. Hunter MP, Nelson M, Kurzer M, Wang X, Kryscio RJ, Head E, et al.  
704 Intersectin 1 contributes to phenotypes in vivo: Implications for Down's  
705 syndrome. *Neuroreport.* 2011;22: 767–772.  
706 doi:10.1097/WNR.0b013e32834ae348
- 707 26. Zanin MP, MacKenzie KD, Peiris H, Pritchard MA, Keating DJ. RCAN1  
708 regulates vesicle recycling and quantal release kinetics via effects on  
709 calcineurin activity. *J Neurochem.* 2013;124: 290–299. doi:10.1111/jnc.12086
- 710 27. Wang X, Zhao Y, Zhang X, Badie H, Zhou Y, Mu Y, et al. Loss of sorting nexin  
711 27 contributes to excitatory synaptic dysfunction by modulating glutamate  
712 receptor recycling in Down's syndrome. *Nat Med.* 2013;19: 473–480.  
713 doi:10.1038/nm.3117

- 714 28. Small SA, Kent K, Pierce A, Leung C, Kang MS, Okada H, et al. Model-guided  
715 microarray implicates the retromer complex in Alzheimer's disease. *Ann*  
716 *Neurol.* 2005;58: 909–919. doi:10.1002/ana.20667
- 717 29. SR R, HJ C, HW L, HK J, C R, YS K, et al. Dual-specificity tyrosine(Y)-  
718 phosphorylation regulated kinase 1A-mediated phosphorylation of amyloid  
719 precursor protein: evidence for a functional link between Down syndrome and  
720 Alzheimer's disease. *J Neurochem.* 2008;104: 1333–1344.
- 721 30. S G-C, N R, V V, S L, C M-C. Normalizing the gene dosage of Dyrk1A in a  
722 mouse model of Down syndrome rescues several Alzheimer's disease  
723 phenotypes. *Neurobiol Dis.* 2017;106: 76–88.
- 724 31. Voytyuk I, Mueller SA, Herber J, Snellinx A, Moechars D, van Loo G, et al.  
725 BACE2 distribution in major brain cell types and identification of novel  
726 substrates. *Life Sci Alliance.* 2018;1. doi:10.26508/lsa.201800026
- 727 32. Hussain I, Powell DJ, Howlett DR, Chapman GA, Gilmour L, Murdock PR, et  
728 al. Asp1 (BACE2) cleaves the amyloid precursor protein at the  $\beta$ -secretase  
729 site. *Mol Cell Neurosci.* 2000;16: 609–619. doi:10.1006/mcne.2000.0884
- 730 33. Abdul-Hay SO, Sahara T, McBride M, Kang D, Leissring MA. Identification of  
731 BACE2 as an avid  $\beta$ -amyloid-degrading protease. *Mol Neurodegener.* 2012;7.  
732 doi:10.1186/1750-1326-7-46
- 733 34. Mok KY, Jones EL, Hanney M, Harold D, Sims R, Williams J, et al.  
734 Polymorphisms in BACE2 may affect the age of onset Alzheimer's dementia in  
735 Down syndrome. *Neurobiol Aging.* 2014;35: 1513.e1-1513.e5.  
736 doi:10.1016/j.neurobiolaging.2013.12.022
- 737 35. Kimura R, Kamino K, Yamamoto M, Nuripa A, Kida T, Kazui H, et al. The  
738 DYRK1A gene, encoded in chromosome 21 Down syndrome critical region,  
739 bridges between  $\beta$ -amyloid production and tau phosphorylation in Alzheimer  
740 disease. *Hum Mol Genet.* 2007;16: 15–23. doi:10.1093/hmg/ddl437
- 741 36. Lee JH, Lee AJ, Dang LH, Pang D, Kisselev S, Krinsky-McHale SJ, et al.  
742 Candidate gene analysis for Alzheimer's disease in adults with Down  
743 syndrome. *Neurobiol Aging.* 2017;56: 150–158.  
744 doi:10.1016/j.neurobiolaging.2017.04.018
- 745 37. Bohdanowicz M, Balkin DM, De Camilli P, Grinstein S. Recruitment of OCRL  
746 and Inpp5B to phagosomes by Rab5 and APPL1 depletes phosphoinositides  
747 and attenuates Akt signaling. *Mol Biol Cell.* 2012;23: 176–187.  
748 doi:10.1091/mbc.E11-06-0489
- 749 38. Lana-Elola E, Watson-Scales S, Slender A, Gibbins D, Martineau A, Douglas  
750 C, et al. Genetic dissection of Down syndrome- associated congenital heart  
751 defects using a new mouse mapping panel. *Elife.* 2016 [cited 20 Oct 2017].  
752 doi:10.7554/eLife.11614.001
- 753 39. Herault Y, Delabar JM, Fisher EMC, Tybulewicz VLJ, Yu E, Brault V. Rodent  
754 models in Down syndrome research: impact and future opportunities. *Dis*  
755 *Model Mech.* 2017;10: 1165–1186. doi:10.1242/dmm.029728
- 756 40. Jiang Y, Mullaney KA, Peterhoff CM, Che S, Schmidt SD, Boyer-Boiteau A, et  
757 al. Alzheimer's-related endosome dysfunction in Down syndrome is A $\beta$ -  
758 independent but requires APP and is reversed by BACE-1 inhibition. *Proc Natl*  
759 *Acad Sci U S A.* 2010;107: 1630–1635. doi:10.1073/pnas.0908953107
- 760 41. Cossec J-C, Simon A, Marquer C, Moldrich RX, Leterrier C, Rossier J, et al.  
761 Clathrin-dependent APP endocytosis and A $\beta$  secretion are highly sensitive to  
762 the level of plasma membrane cholesterol. *Biochim Biophys Acta - Mol Cell*  
763 *Biol Lipids.* 2010;1801: 846–852. doi:10.1016/j.bbalip.2010.05.010

- 764 42. Engidawork E, Lubec G. Protein expression in Down syndrome brain. *Amino*  
765 *Acids*. Springer; 2001. pp. 331–361. doi:10.1007/s007260170001
- 766 43. Cheon MS, Dierssen M, Kim SH, Lubec G. Protein expression of BACE1,  
767 BACE2 and APP in Down syndrome brains. *Amino Acids*. 2008;35: 339–343.  
768 doi:10.1007/s00726-007-0618-9
- 769 44. Lyle R, Gehrig C, Neergaard-Henrichsen C, Deutsch S, Antonarakis SE. Gene  
770 expression from the aneuploid chromosome in a trisomy mouse model of  
771 Down syndrome. *Genome Res*. 2004;14: 1268–1274. doi:10.1101/gr.2090904
- 772 45. Choong XY, Tosh JL, Pulford LJ, Fisher EMC. Dissecting Alzheimer disease in  
773 down syndrome using mouse models. *Frontiers in Behavioral Neuroscience*.  
774 *Frontiers*; 2015. p. 268. doi:10.3389/fnbeh.2015.00268
- 775 46. Percie du Sert, N., et al., The ARRIVE guidelines 2.0: Updated guidelines for  
776 reporting animal research. *PLoS Biol*, 2020. 18(7): p. e3000410.
